# Supplementary material for: No significant crystal orientation effect during sulfur isotope analysis of marcasite using SIMS
Source: Royal Society of Chemistry journal article supplement (doi:10.1039/d4ja00367e), 2025-01-01
Supplement: d4ja00367e1.xlsx [file d4ja00367e1.xlsx]

## Sheet: LA results_NJU
30um,5J/cm2	Signal	Signal	Signal		SE	SE	SE	blank-corrected 34/32S	δ34SV-CDT	2SE
	32S	34S	34/32S		32S	34S	34/32S		‰	‰
PPP-1 TEST	4.50663	0.222424	0.0493544		0.079113	0.00390115	4.98592e-06	0.0493596
PPP-1-1	4.49979	0.222169	0.0493732		0.0788151	0.00389164	5.25989e-06	0.0493785		0.213044
PY-1 TEST	4.77348	0.234307	0.0490868		0.0643182	0.00315076	5.1967e-06	0.0490898	-0.658778	0.211722
PPP-1-1 RE	4.5294	0.223668	0.0493842		0.0812696	0.00400936	5.587e-06	0.0493896		0.226242
S060-G1	4.32901	0.206704	0.0477481		0.0666221	0.00317729	4.4902e-06	0.0477411	-27.9628	0.188106
S060-G2	4.40197	0.211019	0.0479407		0.067156	0.00321381	4.21243e-06	0.0479353	-24.0307	0.175755
PPP-1-2	4.49352	0.221867	0.0493725		0.0651514	0.00321853	5.97075e-06	0.0493778		0.241839
S060-G3	3.96468	0.190991	0.0481731		0.0578225	0.00278718	4.91849e-06	0.048169	-19.4488	0.204218
S060-G4	4.24008	0.204286	0.0481794		0.066111	0.00318143	4.42706e-06	0.0481756	-19.316	0.183789
PPP-1-3	4.58513	0.22651	0.0493995		0.0808146	0.00399145	5.41079e-06	0.0494049		0.219039
S060-G5	4.27561	0.204777	0.0478963		0.0690792	0.003308	4.78118e-06	0.0478903	-25.3345	0.199672
S060-G6	4.52784	0.21621	0.0477587		0.0630509	0.00300892	4.44973e-06	0.0477521	-28.1332	0.186368
PPP-1-4	4.49596	0.222088	0.0493972		0.0724193	0.00357498	5.33894e-06	0.0494027		0.21614
S060-G7	4.24643	0.202657	0.0477276		0.0692722	0.00330595	3.9157e-06	0.0477203	-28.8194	0.164111
S060-G8	4.29057	0.204177	0.0475891		0.0705976	0.00336012	5.25688e-06	0.0475808	-31.6433	0.220967
PPP-1-5	4.41385	0.218065	0.0494037		0.071873	0.00355069	5.05327e-06	0.0494093		0.204547
S060-G9	4.18067	0.20009	0.0478636		0.0672002	0.00321322	4.37438e-06	0.0478572	-26.1771	0.18281
S060-G10	4.01603	0.191676	0.0477273		0.0631655	0.00301447	5.0547e-06	0.0477196	-28.9631	0.21185
PPP-1-6	4.43045	0.218905	0.0494102		0.0676579	0.00333868	6.35988e-06	0.0494159		0.257402
BLK-1 RE	0.0331518	0.00161333	0.0486588		0.000173537	1.29407e-05	0.000259784
PY-1-1	4.14539	0.203559	0.0490993		0.0591442	0.00290564	4.86466e-06	0.0491028	-0.996215	0.198142	mineral inclusion, rejected
PPP-1-7	4.3795	0.216379	0.0494063		0.064508	0.00318508	5.43219e-06	0.049412		0.219873
S060-G11	3.97087	0.191193	0.0481493		0.0619947	0.00298182	5.26667e-06	0.048145	-20.3483	0.218784
S060-G12	4.17886	0.198961	0.0476154		0.0627041	0.00298319	4.04181e-06	0.0476071	-31.2345	0.169799
PPP-1-8	4.45429	0.220069	0.049407		0.0681759	0.00336905	5.09011e-06	0.0494127		0.206025
S060-G13	3.77637	0.181941	0.0481768		0.0653315	0.00314194	5.66188e-06	0.0481725	-19.8871	0.235067
S060-G14	4.02414	0.191315	0.0475452		0.0702234	0.0033347	5.63851e-06	0.047536	-32.7675	0.237231
PPP-1-9	4.27665	0.211315	0.0494158		0.0654294	0.00322979	5.3374e-06	0.0494217		0.215994
S060-G15	4.12669	0.199125	0.0482541		0.0691912	0.00333717	5.13052e-06	0.0482508	-18.4343	0.212661
S060-G16	4.07116	0.195182	0.0479438		0.0596089	0.00285599	3.74084e-06	0.047938	-24.7639	0.15607
PPP-1-10	4.33931	0.214416	0.0494201		0.0766546	0.00378761	5.31365e-06	0.049426		0.215015
S060-G17	4.0768	0.195228	0.0478892		0.0721445	0.00345249	5.244e-06	0.0478829	-25.8026	0.219034
S060-G18	4.12867	0.198906	0.0481746		0.0720752	0.00347179	4.67082e-06	0.0481706	-19.9808	0.193928
PPP-1-11	4.29356	0.212115	0.0494082		0.0596185	0.00294216	5.38897e-06	0.0494141		0.218115
S060-G19	3.96932	0.191369	0.048209		0.0677754	0.00327001	5.3701e-06	0.0482053	-19.2866	0.222801
S060-G20	3.89904	0.187254	0.04803		0.0577442	0.0027742	5.08208e-06	0.0480246	-22.9424	0.211645
PPP-1-12	4.27	0.211029	0.0494206		0.0650679	0.0032177	5.71809e-06	0.0494266		0.231377
BLK-2	0.0328338	0.00160299	0.0487711		0.000180947	1.46419e-05	0.000286637
PY-1-2	4.20895	0.206784	0.0491326		0.0661569	0.00325126	4.35075e-06	0.0491354	-0.503771	0.177092
PPP-1-13	4.34623	0.214738	0.0494131		0.0586571	0.0028981	5.25666e-06	0.0494179		0.212743
S060-G21	3.9495	0.187717	0.0475294		0.0565692	0.0026885	4.78961e-06	0.047519	-33.137	0.201587
S060-G22	4.04993	0.195084	0.0481714		0.0686481	0.00330812	4.98268e-06	0.0481665	-20.0342	0.206894
PPP-1-14	4.20083	0.207573	0.049414		0.0733634	0.00362577	5.55013e-06	0.049419		0.224615
S060-G23	3.98219	0.190812	0.0479156		0.0713988	0.00341967	5.07244e-06	0.0479085	-25.301	0.211755
S060-G24	4.06265	0.19316	0.0475486		0.0653806	0.00310688	4.93399e-06	0.0475386	-32.7862	0.207578
PPP-1-15	4.42186	0.218515	0.0494178		0.0661914	0.00326882	4.56312e-06	0.0494226		0.184657
S060-G25	3.96924	0.188477	0.0474882		0.0609414	0.00289282	5.0354e-06	0.0474775	-34.088	0.212118
S060-G26	4.12318	0.197746	0.0479604		0.0576335	0.00276301	4.89895e-06	0.0479539	-24.4495	0.204319
PPP-1-16	4.20082	0.207606	0.0494206		0.0723973	0.00357717	6.07178e-06	0.0494258		0.245693
S060-G27	4.03012	0.19313	0.0479258		0.0579023	0.00277143	4.96753e-06	0.0479188	-25.2373	0.207331
S060-G28	4.09346	0.194884	0.0476109		0.0722326	0.00344022	4.71565e-06	0.0476015	-31.6567	0.19813
PPP-1-17	4.2034	0.207753	0.0494255		0.058194	0.00287754	4.88863e-06	0.0494307		0.197797
S060-G29	3.77914	0.179723	0.0475535		0.0630263	0.00299727	5.6361e-06	0.0475428	-32.8787	0.237096
S060-G30	4.02544	0.194178	0.0482356		0.0520015	0.00251142	4.20843e-06	0.0482312	-18.952	0.17451
PPP-1-18	4.29455	0.212254	0.0494243		0.0749671	0.00370622	4.71881e-06	0.0494293		0.190931
BLK-3	0.0313273	0.00151018	0.0480972		0.000175715	1.16165e-05	0.000240449
PY-1-3	2.76159	0.135718	0.0491436		0.0863608	0.00424542	6.78088e-06	0.0491556	-0.368742	0.275895
PPP-1-19	4.20725	0.207961	0.0494324		0.0646593	0.00319352	6.56045e-06	0.0494424		0.265378
S060-G31	3.93898	0.188564	0.0478647		0.0571082	0.00273317	3.8742e-06	0.0478629	-26.6639	0.161888
S060-G32	4.05306	0.195654	0.0482761		0.0657474	0.00317262	4.07305e-06	0.0482775	-18.2785	0.168735
PPP-1-20	4.24973	0.210053	0.0494342		0.0751014	0.00370747	5.51919e-06	0.0494442		0.22325
S060-G33	4.01429	0.191583	0.0477221		0.0705411	0.00336304	5.51901e-06	0.0477191	-29.5748	0.231312
S060-G34	3.99279	0.190084	0.0476107		0.0532586	0.0025337	4.57957e-06	0.0476069	-31.8451	0.192391
PPP-1-21	4.21458	0.20834	0.0494328		0.0706066	0.00348928	5.42596e-06	0.0494428		0.219484
S060-G35	3.79748	0.180907	0.0476406		0.0569299	0.00270786	5.14166e-06	0.0476368	-31.1543	0.215869
S060-G36	3.92617	0.187233	0.0476942		0.061904	0.00294662	5.70664e-06	0.047691	-30.0584	0.239317
PPP-1-22	4.09918	0.202581	0.0494251		0.0694744	0.00342942	5.7892e-06	0.0494353		0.234213
S060-G37	4.0213	0.192973	0.0479849		0.0557114	0.00267194	4.49603e-06	0.047984	-24.0332	0.187397
S060-G38	4.05995	0.195891	0.04825		0.0672252	0.00324373	5.27197e-06	0.0482512	-18.6289	0.218522
PPP-1-23	4.17434	0.206305	0.0494228		0.0681367	0.00336662	4.55629e-06	0.0494328		0.184342
S060-G39	4.00139	0.192853	0.048194		0.0652876	0.00314345	5.09502e-06	0.0481948	-19.7737	0.211434
S060-G40	4.00672	0.191995	0.0479182		0.0628878	0.00301736	4.42642e-06	0.0479167	-25.3985	0.184754
PPP-1-24	4.14271	0.204767	0.0494256		0.0635167	0.00313848	4.58736e-06	0.0494358		0.185589
BLK-4	0.0307038	0.00148986	0.0486225		0.000162098	1.40256e-05	0.000329722
PY-1-4	3.76096	0.184846	0.0491472		0.0642816	0.00315928	5.36783e-06	0.0491515	-0.564209	0.21842
PPP-1-25	4.02432	0.198965	0.0494408		0.0647356	0.00320121	5.63038e-06	0.0494471		0.227733
S060-G41	4.02039	0.192822	0.0479593		0.0620439	0.0029757	5.28961e-06	0.0479542	-24.8503	0.220611
S060-G42	3.99608	0.19279	0.0482384		0.06237	0.00300776	4.55716e-06	0.0482354	-19.1623	0.188955
PPP-1-26	4.16979	0.206125	0.0494368		0.056676	0.00280207	5.89685e-06	0.0494428		0.238532
S060-G43	3.96486	0.190061	0.0479362		0.0626617	0.00300317	5.1135e-06	0.0479309	-25.1194	0.21337
S060-G44	3.79259	0.180707	0.0476464		0.065551	0.00311905	4.99472e-06	0.0476384	-31.035	0.209693
PPP-1-27	4.07977	0.201628	0.0494204		0.0648915	0.00320227	5.86046e-06	0.0494264		0.237139
S060-G45	3.66546	0.175053	0.0477566		0.0608934	0.00290073	5.53142e-06	0.0477492	-28.775	0.231686
S060-G46	3.57642	0.17102	0.0478174		0.0488112	0.00233589	4.52361e-06	0.0478105	-27.5364	0.189231
PPP-1-28	4.12172	0.203746	0.0494349		0.0640074	0.00316443	5.492e-06	0.049441		0.222164
S060-G47	3.96536	0.191321	0.0482501		0.073424	0.00353807	5.35029e-06	0.0482472	-18.8413	0.221786
S060-G48	3.94617	0.189121	0.0479297		0.0653793	0.00313003	4.87692e-06	0.0479242	-25.3743	0.203526
PPP-1-29	4.10731	0.203026	0.0494345		0.0711479	0.00351371	5.23855e-06	0.0494406		0.211913
S060-G49	3.81133	0.182678	0.0479327		0.0592975	0.00283925	4.80089e-06	0.0479271	-25.3915	0.200342
S060-G50	3.92764	0.189307	0.0481947		0.0636381	0.00307346	5.71596e-06	0.0481914	-20.0464	0.237219
PPP-1-30	4.15121	0.205251	0.0494425		0.0671913	0.00332168	5.13662e-06	0.0494486		0.207756
BLK-5	0.0297558	0.00144639	0.0488316		0.000177274	1.1916e-05	0.000278694
PY-1-5	4.16153	0.204526	0.0491464		0.0680217	0.00334057	5.48604e-06	0.0491487	-0.604135	0.223243
PPP-1-31	4.163	0.205775	0.0494283		0.0716569	0.00354122	5.83704e-06	0.0494326		0.236162
S060-G51	3.8172	0.182475	0.0477997		0.0572959	0.00274512	5.22597e-06	0.0477916	-28.0118	0.218699
S060-G52	4.00428	0.191181	0.0477421		0.0563561	0.00269432	4.72126e-06	0.0477339	-29.1784	0.197816
PPP-1-32	4.24359	0.209794	0.0494401		0.0659328	0.00325849	6.01965e-06	0.0494444		0.243492
S060-G53	3.51963	0.168584	0.0479032		0.0513937	0.00246083	5.00072e-06	0.0478953	-26.0012	0.208819
S060-G54	3.92311	0.187625	0.0478249		0.0695688	0.00332995	5.95698e-06	0.0478172	-27.5803	0.249156
PPP-1-33	4.28614	0.211903	0.0494372		0.0650361	0.00321612	5.24161e-06	0.0494415		0.212033
S060-G55	3.89623	0.187569	0.0481451		0.05757	0.00276927	4.91061e-06	0.0481398	-21.0398	0.204014
S060-G56	3.74667	0.180812	0.0482604		0.0519445	0.00250364	5.03409e-06	0.0482558	-18.6937	0.208642
PPP-1-34	4.16418	0.20585	0.0494385		0.0792356	0.00391603	6.06553e-06	0.0494428		0.245355
S060-G57	3.83126	0.183106	0.0477833		0.0569122	0.0027211	4.44052e-06	0.047775	-28.3498	0.185893
S060-G58	4.09755	0.195869	0.0478022		0.0634347	0.00302845	5.23371e-06	0.0477946	-27.9539	0.219008
PPP-1-35	4.23776	0.209457	0.0494302		0.0680135	0.00335635	5.49279e-06	0.0494345		0.222225
S060-G59	4.04926	0.193664	0.0478251		0.0700535	0.00335042	6.26857e-06	0.0478176	-27.4055	0.262187
S060-G60	3.92253	0.187993	0.0479309		0.0571265	0.00273964	4.77995e-06	0.047924	-25.2532	0.19948
PPP-1-36	4.15308	0.205306	0.0494301		0.0606148	0.00299478	5.61065e-06	0.0494344		0.226994
BLK-6	0.0286963	0.00139802	0.0487051		0.000151807	1.24876e-05	0.000303716
PY-1-6	4.06081	0.199594	0.0491539		0.0653867	0.0032116	5.03045e-06	0.0491571	-0.264366	0.204668
PPP-1-37	4.19424	0.207295	0.049425		0.0700761	0.00346201	5.94332e-06	0.0494299		0.240475
S060-G61	3.84804	0.184468	0.0479389		0.0579664	0.0027769	5.64006e-06	0.0479331	-25.0105	0.235331
S060-G62	3.99105	0.19155	0.0479946		0.0616649	0.00295802	4.41027e-06	0.0479894	-23.8711	0.183802
PPP-1-38	4.159	0.205577	0.0494278		0.0683433	0.00337656	5.38411e-06	0.0494329		0.217835
S060-G63	3.93942	0.190053	0.0482445		0.0567747	0.0027401	5.15318e-06	0.0482412	-18.9068	0.213642
S060-G64	3.58824	0.170433	0.0474955		0.0475336	0.00225954	5.38449e-06	0.0474857	-34.1871	0.226784
PPP-1-39	4.09534	0.202448	0.0494378		0.0674828	0.00333609	5.18053e-06	0.0494429		0.209556
S060-G65	3.89951	0.186398	0.0478033		0.0533351	0.00254917	4.62271e-06	0.0477966	-28.0711	0.193433
S060-G66	3.90941	0.188692	0.0482694		0.0652721	0.00315003	5.72586e-06	0.0482662	-18.5731	0.237262
PPP-1-40	4.03335	0.199417	0.0494451		0.0697241	0.00344364	5.90096e-06	0.0494504		0.238662
S060-G67	3.73366	0.177539	0.0475494		0.0640178	0.00304347	4.78551e-06	0.0475404	-33.3715	0.201324
S060-G68	3.65606	0.176437	0.0482646		0.0558909	0.00269518	4.52747e-06	0.0482612	-18.7972	0.187624
PPP-1-41	4.16998	0.20619	0.0494501		0.0625127	0.00309029	5.12964e-06	0.0494553		0.207446
PY-1-7	3.82181	0.187903	0.0491746		0.0713409	0.00350376	5.05879e-06	0.0491781	-0.172827	0.205733
PY-1-8	4.10777	0.201899	0.0491542		0.0636476	0.00312542	4.2407e-06	0.0491574	-0.591867	0.172536
PPP-1-42	4.11137	0.203235	0.0494371		0.0633534	0.00312667	6.59482e-06	0.0494422		0.266769
BLK-7	0.0278964	0.00134078	0.0482515		0.000156881	1.3919e-05	0.000380499
PY-1-9	3.92739	0.19302	0.0491509		0.071192	0.00349758	4.72188e-06	0.0491542	-0.492674	0.192125
PPP-1-43	4.19287	0.207273	0.049434		0.064261	0.00317359	5.07438e-06	0.049439		0.205278
								Ave	-0.469041
								2SD	0.331552

## Sheet: LA results_Beijing
		Signal	Signal	SE	SE	δ34Sref	δ34SV-CDT	2SE
		32S	34/32S	32S	34/32S	‰	‰	‰
The first session
30UM	ZX-1	12.2631	0.0476662	0.153952	1.49312e-06		17.4872	0.0626488
	Grain08	11.9092	0.0453897	0.154505	1.46237e-06	-47.3942	-31.1999	0.0644361
	Grain12	11.3216	0.0455197	0.170664	2.06254e-06	-44.6657	-28.425	0.0906218
	Grain19	11.8785	0.0459739	0.161831	1.9618e-06	-35.1337	-18.7309	0.0853442
	ZX-2	11.7154	0.0476296	0.138846	1.92532e-06		16.9107	0.0808455
	Grain20	11.4909	0.0459353	0.1652	6.49337e-06	-35.3655	-18.9667	0.282718
	Grain31	11.197	0.045698	0.164544	2.01789e-06	-40.35	-24.036	0.0883142
	Grain33	11.0781	0.0457989	0.121637	2.65192e-06	-38.2294	-21.8793	0.115807
	ZX-3	11.3011	0.0476092	0.137506	1.90707e-06		17.0317	0.0801136
	Grain35	11.2728	0.0453584	0.158019	2.0465e-06	-46.851	-30.6474	0.0902369
	Grain36	10.8824	0.045637	0.130939	2.77875e-06	-40.995	-24.692	0.121776
	Grain41	11.2988	0.0456205	0.161471	1.44773e-06	-41.3431	-25.046	0.0634684
	ZX-4	11.2538	0.0475729	0.132836	2.93892e-06		16.5215	0.123555
	ZX-5	10.7684	0.0475817	0.146948	2.6196e-06		17.1179	0.11011
	Grain44	11.0054	0.0455625	0.156714	2.30032e-06	-42.2619	-25.9803	0.100975
	Grain45	10.6057	0.0457001	0.100664	2.02823e-06	-39.3694	-23.0387	0.0887626
	Grain62	10.4201	0.045677	0.151636	2.09307e-06	-39.8541	-23.5316	0.0916465
	ZX-6	10.4545	0.0475644	0.133899	1.52897e-06		16.6936	0.0642903
	UWPy-1-1	8.43977	0.0474808	0.148274	2.17459e-06	-1.18919	15.7906	0.0915986
	UWPy-1-2	8.58961	0.0474867	0.150126	2.22931e-06	-1.06516	15.9167	0.093892
	UWPy-1-3	8.53742	0.0474846	0.13908	2.32658e-06	-1.11064	15.8705	0.097993
						Ave	15.8593	0.127623
The second session		Signal	Signal	SE	SE	δ34Sref	δ34SV-CDT	2SE
		32S	34/32S	32S	34/32S	‰	‰	‰
	JX-14	14.4493	0.0473574	0.201409	1.76881e-06
	ZX-6	15.0515	0.0473645	0.212858	2.41239e-06	0.255319	17.1596	0.101865
	JX-15	14.9304	0.0473475	0.209902	2.03216e-06
	ZX-7	14.9482	0.0473704	0.208661	4.70329e-06	0.511826	17.4205	0.198575
	JX-16	14.7304	0.0473449	0.208939	4.34024e-06
	ZX-8	14.9041	0.0473452	0.220876	2.99631e-06	0.0954465	16.9971	0.126573
	JX-17	14.9013	0.0473364	0.213139	3.58092e-06
	G1-1	11.6283	0.0451451	0.16871	2.75374e-06	-46.1164	-29.9958	0.121995
	G2-1	13.4699	0.0454067	0.179452	5.58511e-06	-40.5879	-24.3738	0.246004
	G3-1	13.4254	0.045601	0.156364	2.04855e-06	-36.4828	-20.1994	0.0898466
	JX-18	14.7854	0.0473189	0.20823	2.17267e-06
	G4	14.6538	0.0455937	0.167263	3.11342e-06	-36.2842	-19.9974	0.136572
	G5	14.4606	0.0452672	0.197331	3.90329e-06	-43.1845	-27.0143	0.172455
	G6	14.8417	0.0451819	0.223671	2.64353e-06	-44.988	-28.8483	0.117017
	JX-19	14.6226	0.0473017	0.218081	1.89321e-06
	G7	14.6594	0.0451393	0.19038	5.90924e-06	-45.6514	-29.5229	0.261822
	G9	14.6438	0.0453109	0.188258	2.307e-06	-42.0236	-25.8338	0.10183
	G10	14.6369	0.045115	0.197323	2.74063e-06	-46.1657	-30.0459	0.121495
	JX-20	14.9577	0.0472954	0.205431	2.56774e-06
	ZX-9	15.179	0.0472666	0.228748	1.85956e-06	-0.543957	16.3469	0.0786838
	JX-21	14.9049	0.0472893	0.222406	3.38696e-06
	G11	14.4623	0.0456826	0.166438	1.45596e-06	-33.7191	-17.389	0.0637424
	G13	13.6754	0.0455839	0.130296	3.91266e-06	-35.8058	-19.5109	0.171668
	G14	14.5898	0.044943	0.192992	3.22137e-06	-49.3628	-33.2971	0.143353
	JX-22	14.7473	0.0472642	0.205743	2.75871e-06
	G15	14.2748	0.0456074	0.207685	1.92889e-06	-34.8482	-18.5371	0.0845866
	G16	14.4898	0.0453046	0.194601	2.19877e-06	-41.2561	-25.0533	0.0970663
	G17	14.5049	0.04541	0.205764	5.6194e-06	-39.0252	-22.7847	0.247496
	JX-23	15.0302	0.047244	0.209622	2.49516e-06
	G18	14.6054	0.0455276	0.206445	2.07598e-06	-36.169	-19.8802	0.0911965
	G21	14.6887	0.0448845	0.204955	3.33961e-06	-49.7837	-33.7251	0.148809
	G22	14.6923	0.0455353	0.181945	2.77996e-06	-36.0074	-19.7159	0.122101
	JX-24	14.8811	0.0472282	0.222524	1.92842e-06
	ZX-10	14.8552	0.047231	0.200457	2.00174e-06	0.14303	17.0454	0.0847638
	JX-25	14.9722	0.0472202	0.202904	2.8012e-06
	G23	14.9453	0.0452433	0.166154	3.33317e-06	-41.6866	-25.4911	0.147344
	G24	14.4834	0.0448741	0.178305	5.49563e-06	-49.507	-33.4437	0.244936
	G25	14.5281	0.0448393	0.183055	2.33052e-06	-50.2441	-34.1932	0.10395
	JX-26	14.8833	0.0472026	0.200363	2.11978e-06
	G26	14.819	0.0452225	0.227379	2.35776e-06	-41.711	-25.5159	0.104274
	G27	14.5302	0.0452201	0.207142	2.45028e-06	-41.7621	-25.5679	0.108371
	G28	14.5163	0.0448939	0.212719	3.78978e-06	-48.6747	-32.5973	0.168833
	JX-27	14.646	0.0471793	0.198981	2.45192e-06
	G29	14.6434	0.044714	0.16086	1.6682e-06	-52.0539	-36.0336	0.0746164
	G30	14.0322	0.0454529	0.185337	1.97162e-06	-36.3905	-20.1055	0.0867543
	G32	14.2925	0.0455057	0.18365	4.06747e-06	-35.2696	-18.9656	0.178767
	JX-28	14.8489	0.0471595	0.207918	2.48577e-06
	ZX-11	14.7884	0.0471724	0.202255	5.98802e-06	0.367935	17.2742	0.253878
	JX-29	14.7728	0.0471505	0.199724	3.0983e-06
	JX-33	14.3647	0.0470149	0.204396	1.99483e-06
	ZX-12	14.4741	0.0470162	0.196053	2.28727e-06	0.0165797	16.9169	0.097297
	JX-34	14.6931	0.047016	0.213447	1.9785e-06
	G34	14.1914	0.0447491	0.193673	3.73984e-06	-48.0145	-31.926	0.167147
	G37	13.9476	0.0450128	0.207773	2.78925e-06	-42.4044	-26.2211	0.123931
	G38	13.7958	0.0452995	0.193365	2.06683e-06	-36.3039	-20.0174	0.0912516
	JX-35	14.359	0.0469961	0.199168	2.29586e-06
	G39	14.4612	0.0452523	0.199344	1.49119e-06	-36.8867	-20.6101	0.0659054
	G40	14.4157	0.0449619	0.194793	2.76578e-06	-43.0667	-26.8945	0.123028
	G42	14.0088	0.0452865	0.211017	1.78886e-06	-36.1588	-19.8699	0.079002
	JX-36	14.3648	0.0469748	0.201526	2.42589e-06
	G43	14.2823	0.0449691	0.193016	1.37381e-06	-42.5185	-26.337	0.0611003
	G46	13.9999	0.044885	0.160814	2.39067e-06	-44.3104	-28.1593	0.106524
	G47	13.9026	0.0452426	0.188145	2.07877e-06	-36.6964	-20.4166	0.0918943
	JX-37	14.5436	0.0469573	0.197766	3.39512e-06
	ZX-13	14.5063	0.0469518	0.212998	2.17087e-06	0.00573996	16.9058	0.0924723
	JX-38	14.2458	0.0469457	0.207861	1.82761e-06
	G48	14.0917	0.0449117	0.179933	3.13993e-06	-43.2154	-27.0458	0.139827
	G49	13.9084	0.0449681	0.181396	1.76816e-06	-42.0151	-25.8252	0.0786407
	G50	13.8621	0.04521	0.187569	3.08669e-06	-36.8606	-20.5835	0.136549
	JX-39	14.2318	0.0469349	0.184961	4.15256e-06
	G51	13.8316	0.0448206	0.183042	2.46011e-06	-44.8632	-28.7214	0.109776
	G52	13.975	0.0447683	0.198815	2.42111e-06	-45.9764	-29.8534	0.108162
	G53	13.6207	0.0447922	0.112841	3.26725e-06	-45.4674	-29.3358	0.145885
	JX-40	13.9767	0.0469167	0.184051	3.07807e-06
	G54	14.0412	0.0449528	0.185698	2.52797e-06	-41.446	-25.2464	0.112472
	G55	14.2168	0.0451733	0.186684	2.85169e-06	-36.7454	-20.4664	0.126256
	G56	14.0891	0.0452565	0.15359	2.24254e-06	-34.9705	-18.6616	0.0991036
	JX-41	14.4933	0.0468763	0.196816	3.75717e-06
	ZX-14	14.5815	0.0468706	0.225785	2.64754e-06	0.0846978	16.9861	0.112973
	JX-42	14.4776	0.0468569	0.20575	2.38291e-06
	G57	14.8172	0.0448408	0.18766	3.56423e-06	-42.7601	-26.5827	0.158973
	G58	14.5528	0.0448538	0.172193	3.42393e-06	-42.4823	-26.3003	0.152671
	G59	14.6939	0.0447923	0.189082	2.21364e-06	-43.795	-27.6352	0.0988403
	JX-43	15.0668	0.0468309	0.210858	3.01952e-06
	G60	15.0528	0.044918	0.192129	2.28441e-06	-40.8817	-24.6726	0.101714
	G61	15.1269	0.0448839	0.179003	2.45129e-06	-41.6092	-25.4124	0.109228
	G63	14.9144	0.0451612	0.185423	2.20244e-06	-35.6881	-19.3913	0.0975368
	JX-44	15.2804	0.0468344	0.204766	1.73751e-06
	ZX-15	15.3348	0.0468226	0.200901	2.68875e-06	-0.270416	16.625	0.114848
	JX-45	15.2643	0.0468362	0.204982	1.79423e-06
	G64	14.4875	0.0443875	0.143482	2.38971e-06	-52.2394	-36.2222	0.107675
	G65	15.1335	0.0447226	0.20558	2.70384e-06	-45.0854	-28.9474	0.120916
	G66	15.0215	0.0452288	0.209639	2.85576e-06	-34.2767	-17.956	0.12628
	JX-46	15.0743	0.046832	0.209844	1.9285e-06
	G67	15.0882	0.044538	0.161895	2.45555e-06	-49.0445	-32.9733	0.110267
	G68	14.572	0.0452038	0.143521	1.61377e-06	-34.8278	-18.5164	0.0713998
	JX-47	15.0368	0.046838	0.212664	2.69696e-06
	ZX-16	15.4871	0.046838	0.211692	3.47474e-06	0.0546594	16.9556	0.148373
	JX-48	15.1363	0.0468329	0.202284	2.55844e-06
	UWPY-1-1	14.4059	0.046978	0.194396	2.52674e-06	-0.880296	16.0048	0.107571
	UWPY-1-2	14.4047	0.0469874	0.189654	3.05368e-06	-0.722183	16.1656	0.129979
	UWPY-1-3	14.6349	0.0469801	0.202219	2.30206e-06	-0.843209	16.0425	0.0980012
					UWPy-1	Ave	16.071	0.168168

## Sheet: SIMS results_NJU
																	Background corrections on other ratios
Sample #			Ipr (nA)	32S/Coeff	1se(%)	34S/32S	1se(%)		δ34Sraw	δ34SV-CDT	2SE	2SD
				L'2		H1/L'2			‰	‰	‰	‰
The first session_T153
PPP-1@05			1.70292	1676803000	0.0262981	0.0448797	0.00158841		16.2377
PPP-1@06			1.70254	1678826000	0.0228669	0.044885	0.00158575		16.3589
Py-1@03			1.7022	1660785000	0.0261165	0.0446308	0.00148087		10.6029	-0.454946	0.0296174	0.134302
Py-1@04			1.70183	1658954000	0.0287264	0.0446294	0.00133412		10.571	-0.486874	0.0266825	0.134302
PPP-1@07			1.69954	1674501000	0.0383554	0.0448888	0.00192126		16.4431
PPP-1@08			1.6974	1671357000	0.0269188	0.044886	0.00147716		16.3813
Py-1@05			1.69999	1657333000	0.0184911	0.0446331	0.00142012		10.6547	-0.403093	0.0284024	0.134302
Py-1@06			1.70036	1661475000	0.0130254	0.0446386	0.00133299		10.7795	-0.278326	0.0266597	0.134302
PPP-1@09			1.69586	1671203000	0.0147063	0.0448857	0.00140267		16.3741
PPP-1@10			1.69789	1676813000	0.0301717	0.0448847	0.00182835		16.3519
								ave	16.3578			ave	-0.741477
								2SD	0.134302			2SD	0.657705
								IMF	11.0578			2SE	0.189863
The third session_T153
Sample #			Ipr (nA)	32S/Coeff	1se(%)	34S/32S	1se(%)		δ34Sraw	δ34SV-CDT	2SE	2SD
				L'2		H1/L'2			‰	‰	‰	‰
PPP-1_5@09			1.78662	1748943000	0.0165251	0.0447585	0.00253429		13.4929
PPP-1_5@10			1.78542	1748606000	0.0165522	0.044766	0.00368843		13.6632
Py-1_5@07			1.78365	1724265000	0.0147948	0.0445021	0.00365084		7.68843	-0.569968	0.0730168	0.212642
Py-1_5@08			1.78106	1673721000	0.0940813	0.0444979	0.0043188		7.5922	-0.666204	0.0863759	0.212642
PPP-1_5@11			1.77449	1744180000	0.0157008	0.044758	0.00273404		13.4816
PPP-1_5@12			1.77411	1743866000	0.0171916	0.0447674	0.00334746		13.6958
Py-1_5@09			1.77573	1730996000	0.0219548	0.0444808	0.00428323		7.20454	-1.05386	0.0856646	0.212642
Py-1_5@10			1.77366	1721894000	0.0190647	0.0444957	0.00475032		7.54306	-0.71534	0.0950064	0.212642
PPP-1_5@13			1.76901	1740260000	0.0145595	0.0447628	0.00294314		13.5914
PPP-1_5@14			1.76713	1737415000	0.00908013	0.0447645	0.0042725		13.6294
Py-1_5@11			1.76751	1715423000	0.0401468	0.0444657	0.00320976		6.86466	-1.39374	0.0641952	0.212642
Py-1_5@12			1.76769	1691752000	0.0278331	0.0444834	0.00241109		7.26409	-0.994309	0.0482218	0.212642
PPP-1_5@15			1.76142	1734468000	0.0123792	0.0447534	0.00376266		13.379
PPP-1_5@16			1.75988	1731482000	0.0174438	0.0447578	0.00395371		13.4786
Py-1_5@13			1.75943	1715996000	0.0187079	0.0444824	0.00504462		7.24145	-1.01695	0.100892	0.212642
Py-1_5@14			1.75906	1713959000	0.0233086	0.0444891	0.00294294		7.39429	-0.864109	0.0588588	0.212642
PPP-1_5@17			1.75286	1727280000	0.0147233	0.0447665	0.00267791		13.674
PPP-1_5@18			1.74982	1725956000	0.0170747	0.0447587	0.0047782		13.4981
								ave	13.5584
								2SD	0.212642
								IMF	8.2584
The fourth session_S060
Sample #			Ipr (nA)	32S/Coeff	1se(%)	34S/32S	1se(%)		δ34Sraw	δ34SV-CDT	2SE	2SD
				L'2		H1/L'2			‰	‰	‰	‰
NJUMc-1 test@01			1.75282	1692314000	0.0459784	0.0432236	0.00641935		-21.2621		0.128387		ave	21.9509
NJUMc-1 test@02			1.75218	1698289000	0.0162722	0.0431749	0.0041174		-22.3655		0.0823479		2SD	0.28912
NJUMc-1 test@03			1.74614	1693763000	0.0111489	0.0432039	0.00404471		-21.7084		0.0808942		IMF	5.91091
UWPy-1@01			1.74197	1693260000	0.0131852	0.0451252	0.0039024		21.7958		0.078048			22.24
NJUMc-1 G@01			1.7372	1683374000	0.01273	0.0431315	0.00376437		-23.3473	-29.2583	0.0752874	0.28912		21.6618
NJUMc-1 G@02			1.73322	1681370000	0.0138668	0.0433685	0.00217944		-17.9819	-23.8929	0.0435888	0.28912
NJUMc-1 G@03			1.72965	1677731000	0.010966	0.0435805	0.00549107		-13.1815	-19.0924	0.109821	0.28912
NJUMc-1 G@04			1.72582	1676263000	0.0128388	0.0435534	0.00392977		-13.7947	-19.7056	0.0785954	0.28912
NJUMc-1 G@05			1.72342	1678921000	0.0220604	0.0432462	0.0047066		-20.751	-26.6619	0.094132	0.28912
NJUMc-1 G@06			1.71786	1678989000	0.0162231	0.0431906	0.00472915		-22.0082	-27.9191	0.0945831	0.28912
NJUMc-1 G@07			1.71302	1675076000	0.0167147	0.0431333	0.00313415		-23.307	-29.2179	0.062683	0.28912
NJUMc-1 G@08			1.70994	1676788000	0.0239097	0.0430238	0.00412999		-25.7865	-31.6974	0.0825998	0.28912
NJUMc-1 G@09			1.70806	1667480000	0.0183706	0.0432988	0.00500167		-19.5582	-25.4691	0.100033	0.28912
NJUMc-1 G@10			1.70705	1675315000	0.0204103	0.043167	0.00509043		-22.5442	-28.4551	0.101809	0.28912
UWPy-1@02			1.70175	1660566000	0.0160513	0.0451279	0.00435523		21.8583		0.0871047
NJUMc-1 G@11			1.69864	1664796000	0.0149026	0.0436967	0.0050119		-10.5503	-16.4612	0.100238	0.28912
NJUMc-1 G@12			1.70044	1666885000	0.0212565	0.0431252	0.00518473		-23.4898	-29.4007	0.103695	0.28912
NJUMc-1 G@13			1.69713	1662502000	0.0136339	0.0435661	0.00368559		-13.5076	-19.4185	0.0737118	0.28912
NJUMc-1 G@14			1.69045	1663796000	0.0289301	0.0429907	0.00847217		-26.536	-32.4469	0.169443	0.28912
NJUMc-1 G@15			1.68579	1661702000	0.0203561	0.0436072	0.0064349		-12.5758	-18.4867	0.128698	0.28912
NJUMc-1 G@16			1.68275	1660469000	0.0206137	0.0433527	0.00499392		-18.3393	-24.2502	0.0998784	0.28912
NJUMc-1 G@17			1.67851	1657617000	0.0184307	0.0433462	0.00455109		-18.4862	-24.3971	0.0910218	0.28912
NJUMc-1 G@18			1.67671	1657085000	0.0207025	0.0435835	0.00220041		-13.112	-19.0229	0.0440083	0.28912
NJUMc-1 G@19			1.67389	1655747000	0.0228246	0.0436098	0.00364623		-12.518	-18.429	0.0729246	0.28912
NJUMc-1 G@20			1.67104	1656480000	0.0110612	0.0436692	0.00381453		-11.1726	-17.0835	0.0762906	0.28912
UWPy-1@03			1.66702	1633075000	0.0162667	0.0451319	0.00482988		21.9489		0.0965976
NJUMc-1 G@21			1.66529	1642512000	0.0272736	0.0429339	0.00494403		-27.8213	-33.7322	0.0988806	0.28912
NJUMc-1 G@22			1.65774	1636092000	0.0298557	0.0435835	0.00663269		-13.1136	-19.0245	0.132654	0.28912
NJUMc-1 G@23			1.65421	1634910000	0.0187326	0.0432945	0.0047191		-19.6576	-25.5685	0.094382	0.28912
NJUMc-1 G@24			1.65234	1622352000	0.0628147	0.0429425	0.00456102		-27.6281	-33.539	0.0912203	0.28912
NJUMc-1 G@25			1.65316	1626252000	0.0240581	0.042917	0.00420261		-28.2042	-34.1151	0.0840522	0.28912
NJUMc-1 G@26			1.64434	1620889000	0.0192895	0.0433152	0.00388636		-19.1877	-25.0986	0.0777271	0.28912
NJUMc-1 G@27			1.64261	1617896000	0.0194629	0.0432856	0.00268973		-19.858	-25.7689	0.0537946	0.28912
NJUMc-1 G@28			1.63709	1609780000	0.0157215	0.0429603	0.00794116		-27.2248	-33.1357	0.158823	0.28912
NJUMc-1 G@29			1.63206	1608292000	0.0270841	0.0428417	0.00896696		-29.9104	-35.8213	0.179339	0.28912
NJUMc-1 G@30			1.62966	1600656000	0.0330133	0.0435636	0.00357255		-13.5626	-19.4735	0.0714509	0.28912
UWPy-1@04			1.62522	1592711000	0.0193234	0.0451048	0.00497213						out of the 2SD range, rejected
NJUMc-1 G@31			1.62094	1587601000	0.0218485	0.0432413	0.00518672		-20.8613	-26.7722	0.103734	0.28912
NJUMc-1 G@32			1.61749	1581357000	0.0254462	0.0435864	0.00656222		-13.0461	-18.957	0.131244	0.28912
NJUMc-1 G@33			1.61234	1571998000	0.0301315	0.0432933	0.00364555		-19.6834	-25.5943	0.072911	0.28912
NJUMc-1 G@34			1.60772	1567694000	0.0206052	0.0430072	0.00402096		-26.1613	-32.0722	0.0804191	0.28912
NJUMc-1 G@35			1.60686	1559144000	0.0315956	0.0429068	0.00545499		-28.4356	-34.3465	0.1091	0.28912
NJUMc-1 G@36			1.60164	1552950000	0.0257009	0.0432702	0.00543207		-20.2074	-26.1183	0.108641	0.28912
NJUMc-1 G@37			1.59725	1556890000	0.0248328	0.0433057	0.0031979		-19.4042	-25.3151	0.063958	0.28912
NJUMc-1 G@38			1.59586	1560485000	0.0248524	0.0435719	0.00244059		-13.3751	-19.286	0.0488117	0.28912
NJUMc-1 G@39			1.59248	1529625000	0.0190405	0.0435153	0.00626399		-14.6579	-20.5688	0.12528	0.28912
NJUMc-1 G@40			1.58925	1557795000	0.031167	0.0432721	0.0043997		-20.1641	-26.075	0.087994	0.28912
UWPy-1@05			1.58426	1558867000	0.0109538	0.0451414	0.00387344		22.1634		0.0774688
NJUMc-1 G@41			1.58148	1550879000	0.0232928	0.0432463	0.0045081		-20.749	-26.6599	0.090162	0.28912
NJUMc-1 G@42			1.57881	1552995000	0.0255131	0.0435733	0.0037161		-13.3436	-19.2545	0.074322	0.28912
NJUMc-1 G@43			1.58989	1559115000	0.0577276	0.0432827	0.00794217		-19.9236	-25.8345	0.158843	0.28912
NJUMc-1 G@44			1.59004	1570464000	0.0208786	0.0431813	0.00444726		-22.2195	-28.1304	0.0889452	0.28912
NJUMc-1 G@45			1.58148	1557709000	0.0247078	0.0433509	0.00463625		-18.3796	-24.2905	0.092725	0.28912
NJUMc-1 G@46			1.57566	1553641000	0.0214074	0.0431882	0.0047054		-22.0625	-27.9735	0.094108	0.28912
NJUMc-1 G@47			1.57145	1552924000	0.0325338	0.0435963	0.00377214		-12.8226	-18.7335	0.0754428	0.28912
NJUMc-1 G@48			1.56582	1548013000	0.0273185	0.0432717	0.00423699		-20.1727	-26.0836	0.0847398	0.28912
NJUMc-1 G@49			1.56	1552919000	0.0270588	0.0433154	0.00504877		-19.1825	-25.0934	0.100975	0.28912
NJUMc-1 G@50			1.55613	1548709000	0.0333911	0.0435304	0.00649173		-14.315	-20.2259	0.129834	0.28912
UWPy-1@06			1.54802	1527003000	0.0172283	0.0451267	0.00527305		21.8312		0.105461
NJUMc-1 G@51			1.54637	1540404000	0.0282206	0.0431929	0.00456546		-21.9572	-27.8682	0.0913091	0.28912
NJUMc-1 G@52			1.54216	1534169000	0.0193864	0.0431512	0.00486678		-22.9019	-28.8129	0.0973355	0.28912
NJUMc-1 G@53			1.53874	1528406000	0.0202329	0.0431583	0.00357303		-22.7416	-28.6525	0.0714607	0.28912
NJUMc-1 G@54			1.53236	1522800000	0.0264103	0.0433374	0.00417265		-18.6852	-24.5962	0.083453	0.28912
NJUMc-1 G@55			1.52763	1515353000	0.0249455	0.0435335	0.00347702		-14.2439	-20.1548	0.0695404	0.28912
NJUMc-1 G@56			1.52173	1501511000	0.0185434	0.0436275	0.00516826		-12.1172	-18.0282	0.103365	0.28912
NJUMc-1 G@57			1.51614	1501945000	0.0245873	0.043261	0.00430666		-20.4152	-26.3261	0.0861333	0.28912
NJUMc-1 G@58			1.51295	1502154000	0.019187	0.0433147	0.00412055		-19.1988	-25.1097	0.0824109	0.28912
NJUMc-1 G@59			1.51058	1494580000	0.0211133	0.0432275	0.00347452		-21.1731	-27.084	0.0694904	0.28912
NJUMc-1 G@60			1.50716	1489865000	0.0319246	0.0433379	0.00721724		-18.673	-24.5839	0.144345	0.28912
UWPy-1@07			1.50412	1483873000	0.0193529	0.0451309	0.00299743		21.927		0.0599487
NJUMc-1 G@61			1.50423	1485737000	0.0324	0.0433112	0.00308012		-19.2787	-25.1897	0.0616025	0.28912
NJUMc-1 G@62			1.49834	1478978000	0.0254488	0.0433206	0.00433807		-19.0648	-24.9757	0.0867613	0.28912
NJUMc-1 G@63			1.49233	1469887000	0.0345017	0.0436015	0.00504126		-12.7044	-18.6153	0.100825	0.28912
NJUMc-1 G@64			1.49192	1465249000	0.0325574	0.0428357	0.00443691		-30.0449	-35.9558	0.0887382	0.28912
NJUMc-1 G@65			1.48655	1463446000	0.0353849	0.0431785	0.00574515		-22.2842	-28.1951	0.114903	0.28912
NJUMc-1 G@66			1.48272	1453082000	0.0435018	0.0436692	0.00469078		-11.1726	-17.0835	0.0938157	0.28912
NJUMc-1 G@67			1.47968	1452268000	0.0299772	0.0429737	0.00510082		-26.9214	-32.8323	0.102016	0.28912
NJUMc-1 G@68			1.47543	1440899000	0.0391618	0.043616	0.00671236		-12.3772	-18.2881	0.134247	0.28912
UWPy-1@08			1.47123	1454214000	0.028384	0.04514	0.00314453		22.1318		0.0628906

## Sheet: comparison of LA and SIMS
	LA-MC-ICP-MS results_Nanjing University							LA-MC-ICP-MS results_Beijing					SIMS results
	Sample ID	δ34SV-CDT(‰)	2SD(‰)	2SE(‰)	Sequence	Average δ34SV-CDT(‰)		Sample ID	δ34SV-CDT(‰)	2SD(‰)	2SE(‰)		Sample ID	δ34SV-CDT(‰)	2SD(‰)	2SE(‰)	Sequence	Average δ34SV-CDT(‰)
	PY-1 TEST	-0.658778	0.331552	0.211722	1	-0.658778		UWPy-1@1	15.7906	0.127623	0.0915986		Py-1@03	-0.454946	0.134302	0.0296174	1	-0.454946
	PY-1-1	-0.996215	0.331552	0.198142	2	-0.827496		UWPy-1@2	15.9167	0.127623	0.093892		Py-1@04	-0.486874	0.134302	0.0266825	2	-0.47091
	PY-1-2	-0.503771	0.331552	0.177092	3	-0.719588		UWPy-1@3	15.8705	0.127623	0.097993		Py-1@05	-0.403093	0.134302	0.0284024	3	-0.448304
	PY-1-3	-0.368742	0.331552	0.275895	4	-0.631876							Py-1@06	-0.278326	0.134302	0.0266597	4	-0.40581
	PY-1-4	-0.564209	0.331552	0.21842	5	-0.618343		UWPY-1-1	16.0048	0.168168	0.107571		Py-1_5@07	-0.569968	0.212642	0.0730168	5	-0.438642
	PY-1-5	-0.604135	0.331552	0.223243	6	-0.615975		UWPY-1-2	16.1656	0.168168	0.129979		Py-1_5@08	-0.666204	0.212642	0.0863759	6	-0.476569
	PY-1-6	-0.264366	0.331552	0.204668	7	-0.565745		UWPY-1-3	16.0425	0.168168	0.0980012		Py-1_5@09	-1.05386	0.212642	0.0856646	7	-0.559039
	PY-1-7	-0.172827	0.331552	0.205733	8	-0.51663							Py-1_5@10	-0.71534	0.212642	0.0950064	8	-0.578577
	PY-1-8	-0.591867	0.331552	0.172536	9	-0.52499							Py-1_5@11	-1.39374	0.212642	0.0641952	9	-0.669151
	PY-1-9	-0.492674	0.331552	0.192125	10	-0.521758		Average	15.9651				Py-1_5@12	-0.994309	0.212642	0.0482218	10	-0.701667
					2SD	0.457031		2SD	0.267621				Py-1_5@13	-1.01695	0.212642	0.100892	11	-0.730329
					2SE	0.144526		2SE	0.109256				Py-1_5@14	-0.864109	0.212642	0.0588588	12	-0.741477
									16.04								2SD	0.657705		δ34SLA-MC-ICP-MS_NJU-δ34SSIMS(‰)	δ34SLA-MC-ICP-MS_Beijing-δ34SSIMS(‰)	δ34SLA-MC-ICP-MS_Beijing-δ34SLA-MC-ICP-MS_NJU(‰)
																	2SE	0.189863
	S060-G1	-27.9628	0.331552	0.188106	1	-27.9628		S060-G1	-29.9958	0.168168	0.121795		NJUMc-1 G@01	-29.2583	0.28912	0.0752874	1	-29.2583		1.29545	-0.737501	-2.03295
	S060-G2	-24.0307	0.331552	0.175755	2	-25.9968		S060-G2	-24.3738	0.168168	0.245803		NJUMc-1 G@02	-23.8929	0.28912	0.0435888	2	-26.5756		-0.137872	-0.480993	-0.343121
	S060-G3	-19.4488	0.331552	0.204218	3	-23.8141		S060-G3	-20.1994	0.168168	0.0897737		NJUMc-1 G@03	-19.0924	0.28912	0.109821	3	-24.0812		-0.356354	-1.10696	-0.750603
	S060-G4	-19.316	0.331552	0.183789	4	-22.6896		S060-G4	-19.9974	0.168168	0.136462		NJUMc-1 G@04	-19.7056	0.28912	0.0785954	4	-22.9873		0.389597	-0.291755	-0.681351
	S060-G5	-25.3345	0.331552	0.199672	5	-23.2186		S060-G5	-27.0143	0.168168	0.172314		NJUMc-1 G@05	-26.6619	0.28912	0.094132	5	-23.7222		1.32739	-0.352344	-1.67974
	S060-G6	-28.1332	0.331552	0.186368	6	-24.0377		S060-G6	-28.8483	0.168168	0.116922		NJUMc-1 G@06	-27.9191	0.28912	0.0945831	6	-24.4217		-0.214134	-0.929147	-0.715013
	S060-G7	-28.8194	0.331552	0.164111	7	-24.7208		S060-G7	-29.5229	0.168168	0.261608		NJUMc-1 G@07	-29.2179	0.28912	0.062683	7	-25.1069		0.398498	-0.304949	-0.703447
	S060-G8	-31.6433	0.331552	0.220967	8	-25.5861		S060-G8	-31.1999	0.127623	0.0644361		NJUMc-1 G@08	-31.6974	0.28912	0.0825998	8	-25.9307		0.0540924	0.497477	0.443385
	S060-G9	-26.1771	0.331552	0.18281	9	-25.6518		S060-G9	-25.8338	0.168168	0.101747		NJUMc-1 G@09	-25.4691	0.28912	0.100033	9	-25.8794		-0.708069	-0.364772	0.343297
	S060-G10	-28.9631	0.331552	0.21185	10	-25.9829		S060-G10	-30.0459	0.168168	0.121396		NJUMc-1 G@10	-28.4551	0.28912	0.101809	10	-26.137		-0.508005	-1.59081	-1.08281
	S060-G11	-20.3483	0.331552	0.218784	11	-25.4707		S060-G11	-17.389	0.168168	0.0636908		NJUMc-1 G@11	-16.4612	0.28912	0.100238	11	-26.137		-3.88713	-0.927735	2.95939
	S060-G12	-31.2345	0.331552	0.169799	12	-25.951		S060-G12	-28.425	0.127623	0.0906218		NJUMc-1 G@12	-29.4007	0.28912	0.103695	12	-25.2574		-1.83382	0.975636	2.80945
	S060-G13	-19.8871	0.331552	0.235067	13	-25.4845		S060-G13	-19.5109	0.168168	0.171529		NJUMc-1 G@13	-19.4185	0.28912	0.0737118	13	-25.6026		-0.468668	-0.0923958	0.376273
	S060-G14	-32.7675	0.331552	0.237231	14	-26.0048		S060-G14	-33.2971	0.168168	0.143236		NJUMc-1 G@14	-32.4469	0.28912	0.169443	14	-25.1269		-0.320539	-0.850134	-0.529595
	S060-G15	-18.4343	0.331552	0.212661	15	-25.5001		S060-G15	-18.5371	0.168168	0.084518		NJUMc-1 G@15	-18.4867	0.28912	0.128698	15	-25.6498		0.0524401	-0.0504087	-0.102849
	S060-G16	-24.7639	0.331552	0.15607	16	-25.454		S060-G16	-25.0533	0.168168	0.0969871		NJUMc-1 G@16	-24.2502	0.28912	0.0998784	16	-25.1722		-0.513727	-0.803136	-0.289409
	S060-G17	-25.8026	0.331552	0.219034	17	-25.4745		S060-G17	-22.7847	0.168168	0.247294		NJUMc-1 G@17	-24.3971	0.28912	0.0910218	17	-25.1146		-1.40549	1.61242	3.01791
	S060-G18	-19.9808	0.331552	0.193928	18	-25.1693		S060-G18	-19.8802	0.168168	0.0911225		NJUMc-1 G@18	-19.0229	0.28912	0.0440083	18	-25.0724		-0.957863	-0.857334	0.100529
	S060-G19	-19.2866	0.331552	0.222801	19	-24.8597		S060-G19	-18.7309	0.127623	0.0853442		NJUMc-1 G@19	-18.429	0.28912	0.0729246	19	-24.7363		-0.857668	-0.301983	0.555685
	S060-G20	-22.9424	0.331552	0.211645	20	-24.7639		S060-G20	-18.9667	0.127623	0.282718		NJUMc-1 G@20	-17.0835	0.28912	0.0762906	20	-24.4044		-5.85888	-1.88325	3.97563
	S060-G21	-33.137	0.331552	0.201587	21	-25.1626		S060-G21	-33.7251	0.168168	0.148686		NJUMc-1 G@21	-33.7322	0.28912	0.0988806	21	-24.0383		0.595129	0.00708401	-0.588045
	S060-G22	-20.0342	0.331552	0.206894	22	-24.9295		S060-G22	-19.7159	0.168168	0.122002		NJUMc-1 G@22	-19.0245	0.28912	0.132654	22	-24.0383		-1.00972	-0.691404	0.31832
	S060-G23	-25.301	0.331552	0.211755	23	-24.9456		S060-G23	-25.4911	0.168168	0.147224		NJUMc-1 G@23	-25.5685	0.28912	0.094382	23	-24.251		0.267479	0.0773289	-0.19015
	S060-G24	-32.7862	0.331552	0.207578	24	-25.2723		S060-G24	-33.4437	0.168168	0.244734		NJUMc-1 G@24	-33.539	0.28912	0.0912203	24	-24.251		0.752848	0.0953319	-0.657516
	S060-G25	-34.088	0.331552	0.212118	25	-25.6249		S060-G25	-34.1932	0.168168	0.103864		NJUMc-1 G@25	-34.1151	0.28912	0.0840522	25	-24.3083		0.0271115	-0.0781392	-0.105251
	S060-G26	-24.4495	0.331552	0.204319	26	-25.5797		S060-G26	-25.5159	0.168168	0.104188		NJUMc-1 G@26	-25.0986	0.28912	0.0777271	26	-24.6929		0.649133	-0.417281	-1.06641
	S060-G27	-25.2373	0.331552	0.207331	27	-25.567		S060-G27	-25.5679	0.168168	0.108283		NJUMc-1 G@27	-25.7689	0.28912	0.0537946	27	-25.0698		0.531587	0.201016	-0.330571
	S060-G28	-31.6567	0.331552	0.19813	28	-25.7845		S060-G28	-32.5973	0.168168	0.168694		NJUMc-1 G@28	-33.1357	0.28912	0.158823	28	-25.0709		1.47907	0.538418	-0.940655
	S060-G29	-32.8787	0.331552	0.237096	29	-26.0292		S060-G29	-36.0336	0.168168	0.0745547		NJUMc-1 G@29	-35.8213	0.28912	0.179339	29	-25.0968		2.94257	-0.21231	-3.15488
	S060-G30	-18.952	0.331552	0.17451	30	-25.7933		S060-G30	-20.1055	0.168168	0.0866837		NJUMc-1 G@30	-19.4735	0.28912	0.0714509	30	-25.3839		0.521536	-0.631969	-1.15351
	S060-G31	-26.6639	0.331552	0.161888	31	-25.8213		S060-G31	-24.036	0.127623	0.0883142		NJUMc-1 G@31	-26.7722	0.28912	0.103734	31	-25.7438		0.108326	2.73623	2.62791
	S060-G32	-18.2785	0.331552	0.168735	32	-25.5856		S060-G32	-18.9656	0.168168	0.178622		NJUMc-1 G@32	-18.957	0.28912	0.131244	32	-25.5348		0.678462	-0.00860845	-0.687071
	S060-G33	-29.5748	0.331552	0.231312	33	-25.7065		S060-G33	-21.8793	0.127623	0.115807		NJUMc-1 G@33	-25.5943	0.28912	0.072911	33	-25.5348		-3.98055	3.71501	7.69557
	S060-G34	-31.8451	0.331552	0.192391	34	-25.8871		S060-G34	-31.926	0.168168	0.167009		NJUMc-1 G@34	-32.0722	0.28912	0.0804191	34	-25.3748		0.227026	0.146199	-0.0808271
	S060-G35	-31.1543	0.331552	0.215869	35	-26.0376		S060-G35	-30.6474	0.127623	0.0902369		NJUMc-1 G@35	-34.3465	0.28912	0.1091	35	-25.3748		3.19215	3.69906	0.50691
	S060-G36	-30.0584	0.331552	0.239317	36	-26.1492		S060-G36	-24.692	0.127623	0.121776		NJUMc-1 G@36	-26.1183	0.28912	0.108641	36	-25.3748		-3.94017	1.4263	5.36647
	S060-G37	-24.0332	0.331552	0.187397	37	-26.0921		S060-G37	-26.2211	0.168168	0.12383		NJUMc-1 G@37	-25.3151	0.28912	0.063958	37	-25.5717		1.28193	-0.905958	-2.18789
	S060-G38	-18.6289	0.331552	0.218522	38	-25.8957		S060-G38	-20.0174	0.168168	0.0911771		NJUMc-1 G@38	-19.286	0.28912	0.0488117	38	-25.8224		0.657072	-0.731409	-1.38848
	S060-G39	-19.7737	0.331552	0.211434	39	-25.7387		S060-G39	-20.6101	0.168168	0.0658516		NJUMc-1 G@39	-20.5688	0.28912	0.12528	39	-25.8307		0.795073	-0.0413099	-0.836383
	S060-G40	-25.3985	0.331552	0.184754	40	-25.7302		S060-G40	-26.8945	0.168168	0.122927		NJUMc-1 G@40	-26.075	0.28912	0.087994	40	-25.8167		0.676558	-0.819506	-1.49606
	S060-G41	-24.8503	0.331552	0.220611	41	-25.7087		S060-G41	-25.046	0.127623	0.0634684		NJUMc-1 G@41	-26.6599	0.28912	0.090162	41	-25.6449		1.80961	1.61395	-0.19566
	S060-G42	-19.1623	0.331552	0.188955	42	-25.5528		S060-G42	-19.8699	0.168168	0.0789375		NJUMc-1 G@42	-19.2545	0.28912	0.074322	42	-25.5147		0.0922202	-0.615337	-0.707557
	S060-G43	-25.1194	0.331552	0.21337	43	-25.5428		S060-G43	-26.337	0.168168	0.0610501		NJUMc-1 G@43	-25.8345	0.28912	0.158843	43	-25.5287		0.715144	-0.502482	-1.21763
	S060-G44	-31.035	0.331552	0.209693	44	-25.6676		S060-G44	-25.9803	0.127623	0.100975		NJUMc-1 G@44	-28.1304	0.28912	0.0889452	44	-25.5287		-2.90461	2.15007	5.05468
	S060-G45	-28.775	0.331552	0.231686	45	-25.7366		S060-G45	-23.0387	0.127623	0.0887626		NJUMc-1 G@45	-24.2905	0.28912	0.092725	45	-25.4779		-4.4845	1.25176	5.73626
	S060-G46	-27.5364	0.331552	0.189231	46	-25.7758		S060-G46	-28.1593	0.168168	0.106437		NJUMc-1 G@46	-27.9735	0.28912	0.094108	46	-25.4779		0.437101	-0.185826	-0.622927
	S060-G47	-18.8413	0.331552	0.221786	47	-25.6282		S060-G47	-20.4166	0.168168	0.0918192		NJUMc-1 G@47	-18.7335	0.28912	0.0754428	47	-25.4779		-0.107829	-1.68311	-1.57528
	S060-G48	-25.3743	0.331552	0.203526	48	-25.6229		S060-G48	-27.0458	0.168168	0.139712		NJUMc-1 G@48	-26.0836	0.28912	0.0847398	48	-25.4779		0.709273	-0.962154	-1.67143
	S060-G49	-25.3915	0.331552	0.200342	49	-25.6182		S060-G49	-25.8252	0.168168	0.078576		NJUMc-1 G@49	-25.0934	0.28912	0.100975	49	-25.4515		-0.298072	-0.731761	-0.433689
	S060-G50	-20.0464	0.331552	0.237219	50	-25.5068		S060-G50	-20.5835	0.168168	0.136437		NJUMc-1 G@50	-20.2259	0.28912	0.129834	50	-25.5064		0.17951	-0.357568	-0.537077
	S060-G51	-28.0118	0.331552	0.218699	51	-25.5559		S060-G51	-28.7214	0.168168	0.126152		NJUMc-1 G@51	-27.8682	0.28912	0.0913091	51	-25.3622		-0.143661	-0.853261	-0.7096
	S060-G52	-29.1784	0.331552	0.197816	52	-25.6256		S060-G52	-29.8534	0.168168	0.126152		NJUMc-1 G@52	-28.8129	0.28912	0.0973355	52	-25.3773		-0.365506	-1.0405	-0.674995
	S060-G53	-26.0012	0.331552	0.208819	53	-25.6326		S060-G53	-29.3358	0.168168	0.126152		NJUMc-1 G@53	-28.6525	0.28912	0.0714607	53	-25.3715		2.65138	-0.68322	-3.3346
	S060-G54	-27.5803	0.331552	0.249156	54	-25.6687		S060-G54	-25.2464	0.168168	0.126152		NJUMc-1 G@54	-24.5962	0.28912	0.083453	54	-25.2686		-2.98413	-0.650274	2.33385
	S060-G55	-21.0398	0.331552	0.204014	55	-25.5846		S060-G55	-20.4664	0.168168	0.126152		NJUMc-1 G@55	-20.1548	0.28912	0.0695404	55	-25.2686		-0.884974	-0.311544	0.57343
	S060-G56	-18.6937	0.331552	0.208642	56	-25.4615		S060-G56	-18.6616	0.168168	0.0990226		NJUMc-1 G@56	-18.0282	0.28912	0.103365	56	-25.3366		-0.665558	-0.633391	0.032167
	S060-G57	-28.3498	0.331552	0.185893	57	-25.5122		S060-G57	-26.5827	0.168168	0.158842		NJUMc-1 G@57	-26.3261	0.28912	0.0861333	57	-25.3366		-2.02369	-0.256607	1.76708
	S060-G58	-27.9539	0.331552	0.219008	58	-25.5543		S060-G58	-26.3003	0.168168	0.152545		NJUMc-1 G@58	-25.1097	0.28912	0.0824109	58	-25.3366		-2.84423	-1.19055	1.65367
	S060-G59	-27.4055	0.331552	0.262187	59	-25.5857		S060-G59	-27.6352	0.168168	0.0987587		NJUMc-1 G@59	-27.084	0.28912	0.0694904	59	-25.3366		-0.321527	-0.551144	-0.229617
	S060-G60	-25.2532	0.331552	0.19948	60	-25.5801		S060-G60	-24.6726	0.168168	0.101631		NJUMc-1 G@60	-24.5839	0.28912	0.144345	60	-25.3366		-0.669232	-0.0886233	0.580609
	S060-G61	-25.0105	0.331552	0.235331	61	-25.5708		S060-G61	-25.4124	0.168168	0.109138		NJUMc-1 G@61	-25.1897	0.28912	0.0616025	61	-25.2061		0.179169	-0.222708	-0.401877
	S060-G62	-23.8711	0.331552	0.183802	62	-25.5434		S060-G62	-23.5316	0.127623	0.0916465		NJUMc-1 G@62	-24.9757	0.28912	0.0867613	62	-25.2257		1.10459	1.44407	0.339478
	S060-G63	-18.9068	0.331552	0.213642	63	-25.438		S060-G63	-19.3913	0.168168	0.097457		NJUMc-1 G@63	-18.6153	0.28912	0.100825	63	-25.2237		-0.291443	-0.775962	-0.48452
	S060-G64	-34.1871	0.331552	0.226784	64	-25.5747		S060-G64	-36.2222	0.168168	0.107585		NJUMc-1 G@64	-35.9558	0.28912	0.0887382	64	-25.2553		1.76864	-0.266456	-2.03509
	S060-G65	-28.0711	0.331552	0.193433	65	-25.6131		S060-G65	-28.9474	0.168168	0.120816		NJUMc-1 G@65	-28.1951	0.28912	0.114903	65	-25.2441		0.124073	-0.752243	-0.876316
	S060-G66	-18.5731	0.331552	0.237262	66	-25.5065		S060-G66	-17.956	0.168168	0.126177		NJUMc-1 G@66	-17.0835	0.28912	0.0938157	66	-25.2221		-1.48968	-0.872541	0.617139
	S060-G67	-33.3715	0.331552	0.201324	67	-25.6238		S060-G67	-32.9733	0.168168	0.110176		NJUMc-1 G@67	-32.8323	0.28912	0.102016	67	-25.2221		-0.539211	-0.141014	0.398197
	S060-G68	-18.7972	0.331552	0.187624	68	-25.5235		S060-G68	-18.5164	0.168168	0.0713414		NJUMc-1 G@68	-18.2881	0.28912	0.134247	68	-25.2221		-0.509131	-0.22831	0.280821
					2SD	9.68157											2SD	10.4153
					2SE	1.17406											2SE	1.26304			-0.129893	2.03745
																					2.16735	-2.29724
																						92.6471
