# Supplementary material for: No significant crystal orientation effect during sulfur isotope analysis of marcasite using SIMS
Source: Royal Society of Chemistry journal article supplement (doi:10.1039/d4ja00367e), 2025-01-01
Supplement: d4ja00367e2.xlsx [file d4ja00367e2.xlsx]

## Sheet: Sheet1
Session	Sample ID	δ34SLA-MC-ICP-MS_beijing - δ34SSIMS(‰)	The component of the angle between the normal vector of the crystal plane of marcasite and the a-axis (i.e., the [100] direction) within the (001) plane	The component of the angle between the normal vector of the crystal plane of marcasite and the b-axis (i.e., the [010] direction) within the (100) plane	The component of the angle between the normal vector of the crystal plane of marcasite and the c-axis (i.e., the [001] direction) within the (010) plane
			Panel a and d	Panel b and e	Panel c and f
1	G08	0.497477	36	43	23
1	G12	0.975636	47	2	43
1	G19	-0.301983	40	34	31
1	G20	-1.88325	51	6	37
1	G31	2.73623	28	30	46
1	G33	3.71501	33	49	20
1	G35	3.69906	7	55	35
1	G36	1.4263	53	31	15
1	G41	1.61395	5	50	40
1	G44	2.15007	80	10	3
1	G45	1.25176	12	39	48
1	G62	1.44407	73	10	12
2	G4	-0.29	9	53	35
2	G7	-0.3	2	72	18
2	G13	-0.09	32	20	50
2	G15	-0.05	90	0	0
2	G23	0.08	8	82	0
2	G25	-0.08	2	50	40
2	G27	0.2	81	9	0
2	G34	0.15	22	57	24
2	G46	-0.19	2	42	48
2	G50	-0.36	39	0	51
2	G59	-0.55	2	52	38
2	G61	-0.22	45	15	40
