# Supplementary material for: No significant crystal orientation effect during sulfur isotope analysis of marcasite using SIMS
Source: Royal Society of Chemistry journal article supplement (doi:10.1039/d4ja00367e), 2025-01-01
Supplement: d4ja00367e3.pdf [file d4ja00367e3.pdf]

**Supplementary material**

**Supplementary material 1.** Original sulfur isotopic composition of NJUMc-1 marcasite determined using LA-MC-ICP-MS and SIMS. The results of the standards used in this study (UWPy-1, PPP-1 and Py-1) are also included.

**Supplementary material 2.** Crystal orientation of the two sets of selected marcasite grains.
